# Supplementary material
Source: Elsevier journal article supplement (https://pure.iiasa.ac.at/cgi/export/eprint/14950/JSON/mmc1.docx)
Supplement: mmc1 [file mmc1.docx]

    {
      "eprintid": 14950,
      "date": "2018-02-01",
      "documents": [
          {
            "language": "en",
            "placement": 1,
            "eprintid": 14950,
            "files": [
                {
                  "hash_type": "MD5",
                  "mtime": "2017-11-13 07:26:07",
                  "datasetid": "document",
                  "fileid": 220560,
                  "objectid": 79878,
                  "uri": "https://pure.iiasa.ac.at/id/file/220560",
                  "mime_type": "application/vnd.openxmlformats-officedocument.wordprocessingml.document",
                  "hash": "4381407cd5c96ec8cd418a8db6d747e6",
                  "filesize": 158817,
                  "filename": "mmc1.docx"
                }
            ],
            "content": "supplemental",
            "license": "cc_by",
            "rev_number": 2,
            "uri": "https://pure.iiasa.ac.at/id/document/79878",
            "main": "mmc1.docx",
            "mime_type": "application/vnd.openxmlformats-officedocument.wordprocessingml.document",
            "docid": 79878,
            "format": "text",
            "security": "public",
            "pos": 1
          },
          {
            "language": "en",
            "placement": 3,
            "eprintid": 14950,
            "files": [
                {
                  "hash_type": "MD5",
                  "mtime": "2017-11-13 15:09:45",
                  "datasetid": "document",
                  "fileid": 220634,
                  "objectid": 79900,
                  "uri": "https://pure.iiasa.ac.at/id/file/220634",
                  "mime_type": "application/pdf",
                  "hash": "e860c946e5eb646b369f37e8bbc03143",
                  "filesize": 876006,
                  "filename": "Manusrcipt_revision with no mark.pdf"
                }
            ],
            "content": "accepted",
            "license": "cc_by_nc_nd",
            "rev_number": 3,
            "uri": "https://pure.iiasa.ac.at/id/document/79900",
            "main": "Manusrcipt_revision with no mark.pdf",
            "mime_type": "application/pdf",
            "docid": 79900,
            "format": "text",
            "security": "public",
            "pos": 3
          }
      ],
      "keywords": "Passenger transport; AIM/Transport; Computable general equilibrium model; Model integration; Mitigation cost",
      "pagerange": "76-88",
      "publisher": "Elsevier",
      "date_type": "published",
      "fp7_project": "no",
      "datestamp": "2017-11-13 07:26:30",
      "uri": "https://pure.iiasa.ac.at/id/eprint/14950",
      "creators_browse_id": [
        2881
      ],
      "publication": "Applied Energy",
      "abstract": "A passenger transport model, Asia-pacific Integrated Model (AIM)/Transport, incorporating travelers\u2019 mode of choice and transport technological details was developed in this study. This AIM/Transport was coupled with the AIM/Computable General Equilibrium (AIM/CGE) to capture interactive mechanisms between the transport sector, energy consumption, greenhouse gas (GHG) emissions, and the macro-economy. This paper presents the model structure and mathematical formulation of AIM/Transport, and explains how it was integrated with the CGE model by an iterative algorithm, taking into consideration the feedback between AIM/Transport and AIM/CGE. A numerical simulation proved that the integration of AIM/CGE and AIM/Transport can achieve a convergence after 13 iterations. A business-as-usual (BaU) scenario and a mitigation scenario were created to test the robustness of the model integration and how the mitigation potential and cost would be modified by coupling AIM/Transport. The key finding was that the carbon price and mitigation cost were modified with the coupled CGE-Transport model.",
      "type": "article",
      "title": "Contribution of the transport sector to climate change mitigation: Insights from a global passenger transport model coupled with a computable general equilibrium model",
      "userid": 353,
      "issn": "1872-9118",
      "rev_number": 15,
      "dir": "disk0/00/01/49/50",
      "creators": [
        {
          "orcid": null,
          "name": {
            "lineage": null,
            "given": "R.",
            "honourific": null,
            "family": "Zhang"
          },
          "id": null
        },
        {
          "orcid": "0000-0001-7897-1796",
          "name": {
            "lineage": null,
            "given": "S.",
            "honourific": null,
            "family": "Fujimori"
          },
          "id": 8258
        },
        {
          "orcid": null,
          "name": {
            "lineage": null,
            "given": "H.",
            "honourific": null,
            "family": "Dai"
          },
          "id": null
        },
        {
          "orcid": null,
          "name": {
            "lineage": null,
            "given": "T.",
            "honourific": null,
            "family": "Hanaoka"
          },
          "id": null
        }
      ],
      "lastmod": "2021-08-27 17:29:37",
      "ispublished": "pub",
      "metadata_visibility": "show",
      "id_number": "10.1016/j.apenergy.2017.10.103",
      "eprint_status": "archive",
      "status_changed": "2017-11-13 07:26:30",
      "volume": 211,
      "coversheets_dirty": "FALSE",
      "full_text_status": "public",
      "refereed": "TRUE",
      "fp7_type": "info:eu-repo/semantics/article",
      "divisions": [
        "prog_ene"
      ]
    }
